# Supplementary material for: Exploring the Control of PARP1 Levels in High-Grade Serous Ovarian Cancer
Source: MDPI journal article supplement (doi:10.3390/cancers15082361), 2023-04-18

## **Supplementary Material**

# **Exploring the Control of PARP1 Levels in High-Grade Serous Ovarian Cancer**

**Giuseppina Raspaglio**<sup>1,2</sup>, **Marianna Buttarelli**<sup>1,2,\*</sup>, **Natalia Cappoli**<sup>1,2</sup>, **Alessandra Ciucci**<sup>1,2</sup>, **Anna Fagotti**<sup>2,3</sup>, **Giovanni Scambia**<sup>2,3</sup> and **Daniela Gallo**<sup>1,2,\*</sup>

<sup>1</sup> Unità di Medicina Traslazionale per la Salute della Donna e del Bambino, Dipartimento Scienze della Salute della Donna, del Bambino e di Sanità Pubblica, Fondazione Policlinico Universitario A. Gemelli, IRCCS, 00168 Roma, Italy

<sup>2</sup> Dipartimento Universitario Scienze della Vita e Sanità Pubblica—Sezione di Ginecologia ed Ostetricia—Università Cattolica del Sacro Cuore, 00168 Roma, Italy

<sup>3</sup> Dipartimento Scienze della Salute della Donna, del Bambino e di Sanità Pubblica, Fondazione Policlinico Universitario A. Gemelli, IRCCS, 00168 Roma, Italy

\* Correspondence: marianna.buttarelli1@unicatt.it (M.B.); daniela.gallo@unicatt.it (D.G.)

This Supplemental material contains:

Supplemental Table S1-S2 and Supplemental Figure S1--S3

**Supplementary Table S1. Primer sequences used for RT-qPCR.**

| <b>Gene Symbol</b>             | <b>Primer Forward</b>  | <b>Primer Reverse</b> | <b>Amplicon Length (bp)</b> |
|--------------------------------|------------------------|-----------------------|-----------------------------|
| <i>STAT1</i>                   | ATGCTGGCACCAGAACGAA    | GCTGGCACAATTGGGTTTCAA | 84                          |
| <i>STAT3</i>                   | GAGAAGGACATCAGCGGTAA   | CAGTGGAGACACCAGGATAT  | 177                         |
| <i>PA28<math>\alpha</math></i> | CCACACCAAGCTAGAAGGCT   | AGCATTGCGGATCTCCATGAC | 138                         |
| <i>PA28<math>\beta</math></i>  | CTTTTCCAGGAGGCTGAGGAAT | ATCATCCTTGGGTGGAGGGT  | 158                         |
| <i>PARP1</i>                   | GCCCTAAAGGCTCAGAACGA   | CTACTCGGTCCAAGATCGCC  | 141                         |
| <i>GAPDH</i>                   | CCTGACCTGCCGTCTAGAAA   | CTCAGTGTAGCCCAGGATGC  | 103                         |

**Supplementary Table S2. List of Antibodies used in Western Blot analysis.**

| <b>Antibody name</b>   | <b>Clone</b> | <b>Supplier</b>                           |
|------------------------|--------------|-------------------------------------------|
| Phospho STAT1 (Tyr701) | Polyclonal   | Santa Cruz Biotechnology (Santa Cruz, CA) |
| STAT1                  | Polyclonal   | Cell Signaling Technology (Boston, MA)    |
| PA28 $\alpha$          | AT12H3       | Santa Cruz Biotechnology                  |
| PA28 $\beta$           | G-10         | Santa Cruz Biotechnology                  |
| PARP1                  | 46D11        | Cell Signaling Technology                 |
| Phospho STAT3 (Tyr705) | D3A7         | Cell Signaling Technology                 |
| STAT3                  | 124H6        | Cell Signaling Technology                 |
| GAPDH                  | 6C5          | Abcam                                     |

**Supplementary Figure S1. Relative Western Blot quantification of PARP1 to GAPDH in OVCAR-3, OV-90 and OV.GEM-9, at the indicated time points and IFN- $\gamma$  concentrations, as shown in figure 2B. Plots refer to three different experiments of which the more representative is shown in figure 2B.**

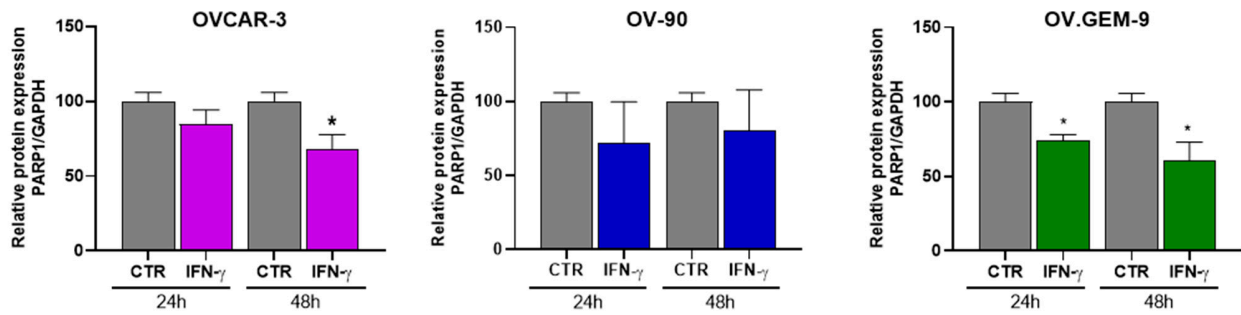

**Supplementary Figure S2. Relative Western Blot quantification of PARP1 to GAPDH in OVCAR-3 and OV-90, after 48 h of STAT1 silencing, as shown in figure 3A. Plots refer to three different experiments of which the more representative is shown in figure 3A.**

**A**

**OVCAR-3**

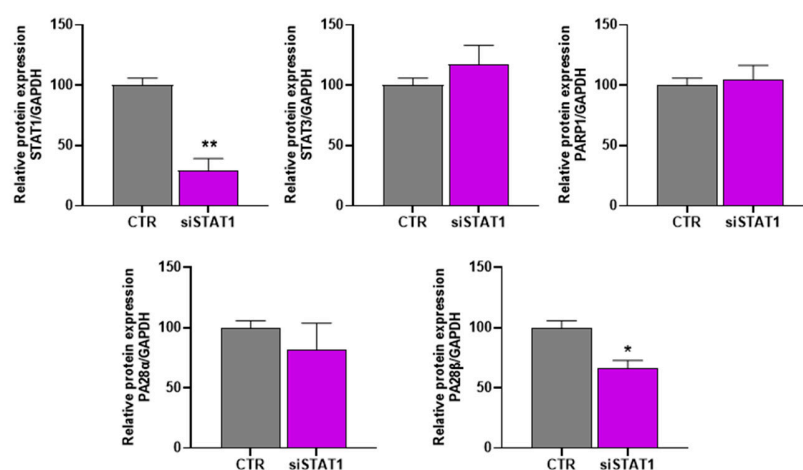

**B**

**OV-90**

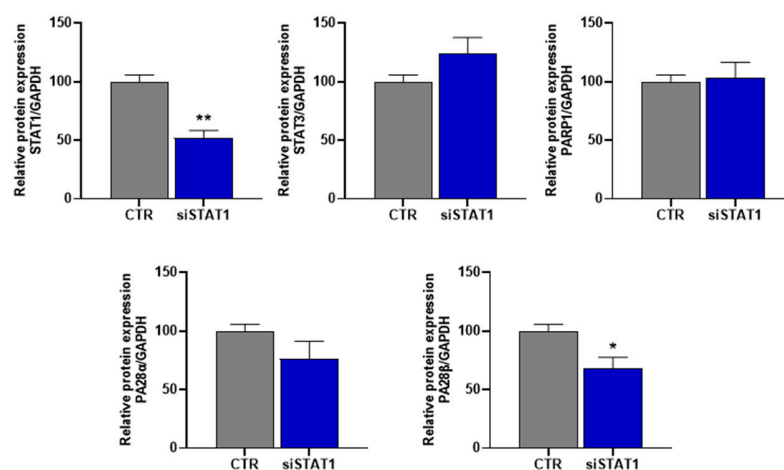

**Supplementary Figure S 3. STAT1 (alias ISGF-3) determines different clinical outcome in suboptimally or optimally debulked high-grade serous ovarian cancer (HGSOC) patients.** The Kaplan–Meier Plotter was used to evaluate the prognostic value of STAT1 (i.e. ISGF-3) (Affymetrix ID 200887\_s\_at) expression in serous ovarian cancer patients, selected for grade 2 and 3 carcinoma, stage 3 and 4; debulk: (A) suboptimal; n=316 for PFS (Progression-free survival) and n=326 for OS (Overall Survival); (B) optimal; n=472 for PFS and n=495 for OS. P-value in the plot represents the result of log-rank test.

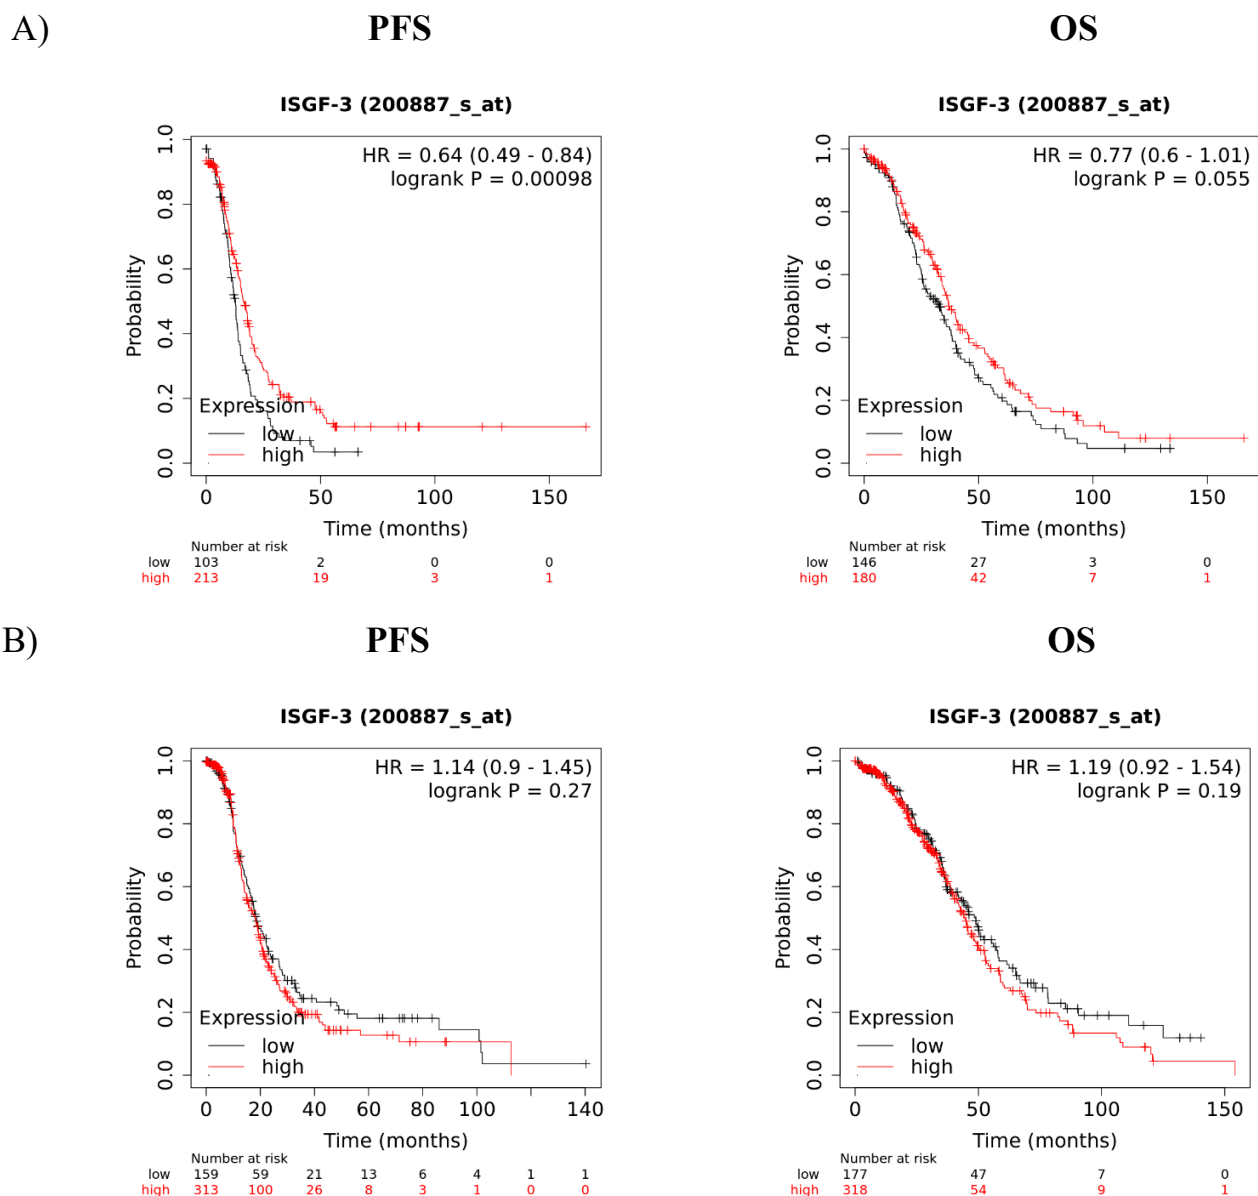

Supplement: s1 [file s1]
